# Supplementary material for: Cationic pair substitution in LaAlO3:Mn4+ for octahedral-tilting-dependent zero-phonon line
Source: Royal Society of Chemistry journal article supplement (doi:10.1039/d2qi01683d), 2022-11-28
Supplement: d2qi01683d1.pdf [file d2qi01683d1.pdf]

## Supplementary information

### **Cationic pair substitution in $\text{LaAlO}_3\text{:Mn}^{4+}$ for octahedral-tilting dependent zero-phonon line**

Siyuan Li,<sup>a</sup> Chenyu Zhang,<sup>a</sup> Qi Zhu<sup>\*a</sup> and Ji-Guang Li<sup>\*b</sup>

*<sup>a</sup>Key Laboratory for Anisotropy and Texture of Materials (Ministry of Education),  
School of Materials Science and Engineering, Northeastern University, Shenyang,  
Liaoning 110819, China*

*<sup>b</sup>Research Center for Functional Materials, National Institute for Materials Science,  
Namiki 1-1, Tsukuba, Ibaraki 305-0044, Japan*

\*Corresponding authors:

Dr. Qi Zhu

Tel: +86-24-8367-2700

E-mail: [zhuq@smm.neu.edu.cn](mailto:zhuq@smm.neu.edu.cn)

Dr. Ji-Guang Li

Tel: +81-29-860-4394

E-mail: [LI.Jiguang@nims.go](mailto:LI.Jiguang@nims.go)

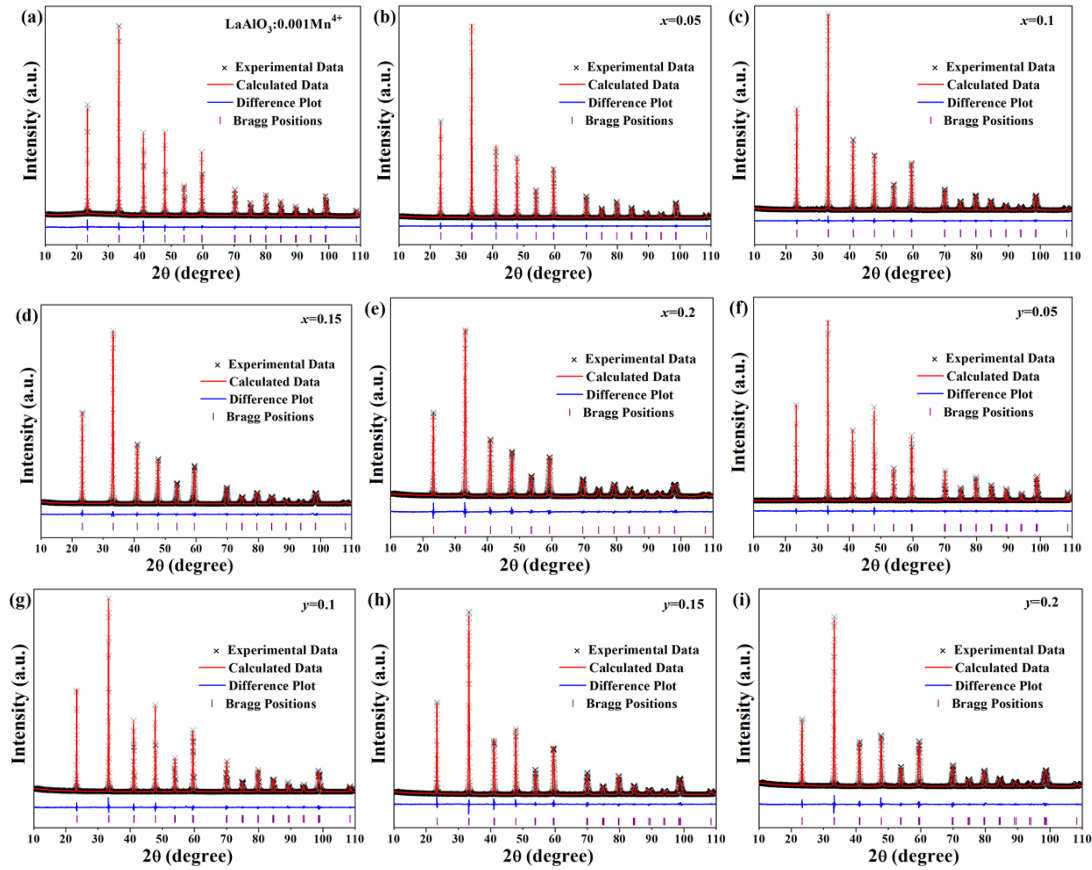

**Fig. S1** Rietveld refinement of LBAT:0.001Mn<sup>4+</sup> ( $x=0-0.2$ ) and LYAG:0.001Mn<sup>4+</sup> ( $y=0-0.2$ ).

**Table S1** The refined crystallographic data of LBAT:0.001Mn<sup>4+</sup> ( $x=0-0.2$ ) and LYAG:0.001Mn<sup>4+</sup> ( $y=0-0.2$ )

| Formula                                   | $a$<br>(Å) | $\beta$<br>(°) | $V$<br>(Å <sup>3</sup> ) | $R_{exp}$<br>(%) | $R_{wp}$<br>(%) | $R_p$<br>(%) | $\chi^2$ |
|-------------------------------------------|------------|----------------|--------------------------|------------------|-----------------|--------------|----------|
| LaAlO <sub>3</sub> :0.001Mn <sup>4+</sup> | 3.7908(1)  | 90.0853(3)     | 54.4728(8)               | 5.13             | 6.83            | 4.86         | 1.33     |
| $x=0.05$                                  | 3.7961(2)  | 90.0691(30)    | 54.703(10)               | 5.31             | 8.05            | 4.90         | 1.52     |
| $x=0.1$                                   | 3.8018(1)  | 90.0610(38)    | 54.9507(40)              | 5.39             | 9.29            | 5.05         | 1.72     |
| $x=0.15$                                  | 3.8092(2)  | 90.041(13)     | 55.2716(93)              | 5.14             | 9.27            | 5.61         | 1.80     |
| $x=0.2$                                   | 3.8186(2)  | 90.012(20)     | 55.6830(67)              | 5.59             | 9.46            | 6.27         | 1.69     |
| $y=0.05$                                  | 3.7949(1)  | 90.1253(27)    | 54.6514(56)              | 7.30             | 13.89           | 5.89         | 1.90     |
| $y=0.1$                                   | 3.7975(1)  | 90.1593(6)     | 54.7654(18)              | 6.53             | 11.21           | 6.32         | 1.72     |
| $y=0.15$                                  | 3.8015(2)  | 90.1842(12)    | 54.9352(64)              | 5.87             | 9.12            | 6.05         | 1.55     |
| $y=0.2$                                   | 3.8023(2)  | 90.2135(28)    | 54.970(12)               | 6.38             | 9.73            | 6.66         | 1.53     |

**Table S2** Wyckoff lattice position (Wyck), atomic coordinates ( $x$ ,  $y$ ,  $z$ ), isotropic displacement parameter ( $B_{\text{iso}}$ ) and atom occupancy (Occ.) for LBAT:0.001Mn<sup>4+</sup> ( $x=0-0.2$ ) and LYAG:0.001Mn<sup>4+</sup> ( $y=0-0.2$ )

| Atom                                      | Wyck. | $x$ | $y$ | $z$ | $B_{\text{iso}}$ (Å <sup>2</sup> ) | Occ.  |
|-------------------------------------------|-------|-----|-----|-----|------------------------------------|-------|
| LaAlO <sub>3</sub> :0.001Mn <sup>4+</sup> |       |     |     |     |                                    |       |
| La                                        | 1a    | 0   | 0   | 0   | 0.94(15)                           | 1     |
| Al                                        | 1a    | 0.5 | 0.5 | 0.5 | 0.69(16)                           | 0.999 |
| O                                         | 3b    | 0.5 | 0.5 | 0   | 1.48(16)                           | 1     |
| Mn                                        | 1a    | 0.5 | 0.5 | 0.5 | 0.69(16)                           | 0.001 |
| $x=0.05$                                  |       |     |     |     |                                    |       |
| La                                        | 1a    | 0   | 0   | 0   | 1.45(30)                           | 0.95  |
| Al                                        | 1a    | 0.5 | 0.5 | 0.5 | 2.06(27)                           | 0.949 |
| O                                         | 3b    | 0.5 | 0.5 | 0   | 2.77(38)                           | 1     |
| Ba                                        | 1a    | 0   | 0   | 0   | 1.45(30)                           | 0.05  |
| Ti                                        | 1a    | 0.5 | 0.5 | 0.5 | 2.06(27)                           | 0.05  |
| Mn                                        | 1a    | 0.5 | 0.5 | 0.5 | 2.06(27)                           | 0.001 |
| $x=0.1$                                   |       |     |     |     |                                    |       |
| La                                        | 1a    | 0   | 0   | 0   | 0.559(64)                          | 0.90  |
| Al                                        | 1a    | 0.5 | 0.5 | 0.5 | 0.397(72)                          | 0.899 |
| O                                         | 3b    | 0.5 | 0.5 | 0   | 0.712(81)                          | 1     |
| Ba                                        | 1a    | 0   | 0   | 0   | 0.559(64)                          | 0.1   |
| Ti                                        | 1a    | 0.5 | 0.5 | 0.5 | 0.397(72)                          | 0.1   |
| Mn                                        | 1a    | 0.5 | 0.5 | 0.5 | 0.397(72)                          | 0.001 |
| $x=0.15$                                  |       |     |     |     |                                    |       |
| La                                        | 1a    | 0   | 0   | 0   | 0.749(61)                          | 0.85  |
| Al                                        | 1a    | 0.5 | 0.5 | 0.5 | 0.645(80)                          | 0.849 |
| O                                         | 3b    | 0.5 | 0.5 | 0   | 1.49(13)                           | 1     |
| Ba                                        | 1a    | 0   | 0   | 0   | 0.749(61)                          | 0.15  |
| Ti                                        | 1a    | 0.5 | 0.5 | 0.5 | 0.645(80)                          | 0.15  |
| Mn                                        | 1a    | 0.5 | 0.5 | 0.5 | 0.645(80)                          | 0.001 |
| $x=0.2$                                   |       |     |     |     |                                    |       |
| La                                        | 1a    | 0   | 0   | 0   | 0.388(43)                          | 0.8   |
| Al                                        | 1a    | 0.5 | 0.5 | 0.5 | 0.188(24)                          | 0.799 |
| O                                         | 3b    | 0.5 | 0.5 | 0   | 0.583(68)                          | 1     |
| Ba                                        | 1a    | 0   | 0   | 0   | 0.388(43)                          | 0.2   |
| Ti                                        | 1a    | 0.5 | 0.5 | 0.5 | 0.188(24)                          | 0.2   |
| Mn                                        | 1a    | 0.5 | 0.5 | 0.5 | 0.188(24)                          | 0.001 |
| $y=0.05$                                  |       |     |     |     |                                    |       |
| La                                        | 1a    | 0   | 0   | 0   | 1.19(60)                           | 0.95  |
| Al                                        | 1a    | 0.5 | 0.5 | 0.5 | 3.00(12)                           | 0.949 |
| O                                         | 3b    | 0.5 | 0.5 | 0   | 2.64(17)                           | 1     |
| Y                                         | 1a    | 0   | 0   | 0   | 1.19(60)                           | 0.05  |
| Ga                                        | 1a    | 0.5 | 0.5 | 0.5 | 3.00(82)                           | 0.05  |
| Mn                                        | 1a    | 0.5 | 0.5 | 0.5 | 3.00(82)                           | 0.001 |

|          |    |     |     |     |          |       |
|----------|----|-----|-----|-----|----------|-------|
| $y=0.1$  |    |     |     |     |          |       |
| La       | 1a | 0   | 0   | 0   | 0.67(13) | 0.90  |
| Al       | 1a | 0.5 | 0.5 | 0.5 | 0.28(17) | 0.899 |
| O        | 3b | 0.5 | 0.5 | 0   | 2.21(25) | 1     |
| Y        | 1a | 0   | 0   | 0   | 0.67(13) | 0.1   |
| Ga       | 1a | 0.5 | 0.5 | 0.5 | 0.28(17) | 0.1   |
| Mn       | 1a | 0.5 | 0.5 | 0.5 | 0.28(17) | 0.001 |
| $y=0.15$ |    |     |     |     |          |       |
| La       | 1a | 0   | 0   | 0   | 0.20(20) | 0.85  |
| Al       | 1a | 0.5 | 0.5 | 0.5 | 0.23(19) | 0.849 |
| O        | 3b | 0.5 | 0.5 | 0   | 1.95(21) | 1     |
| Y        | 1a | 0   | 0   | 0   | 0.20(20) | 0.15  |
| Ga       | 1a | 0.5 | 0.5 | 0.5 | 0.23(19) | 0.15  |
| Mn       | 1a | 0.5 | 0.5 | 0.5 | 0.23(19) | 0.001 |
| $y=0.2$  |    |     |     |     |          |       |
| La       | 1a | 0   | 0   | 0   | 0.89(20) | 0.80  |
| Al       | 1a | 0.5 | 0.5 | 0.5 | 0.80(20) | 0.799 |
| O        | 3b | 0.5 | 0.5 | 0   | 3.00(24) | 1     |
| Y        | 1a | 0   | 0   | 0   | 0.89(20) | 0.2   |
| Ga       | 1a | 0.5 | 0.5 | 0.5 | 0.80(20) | 0.2   |
| Mn       | 1a | 0.5 | 0.5 | 0.5 | 0.80(20) | 0.001 |

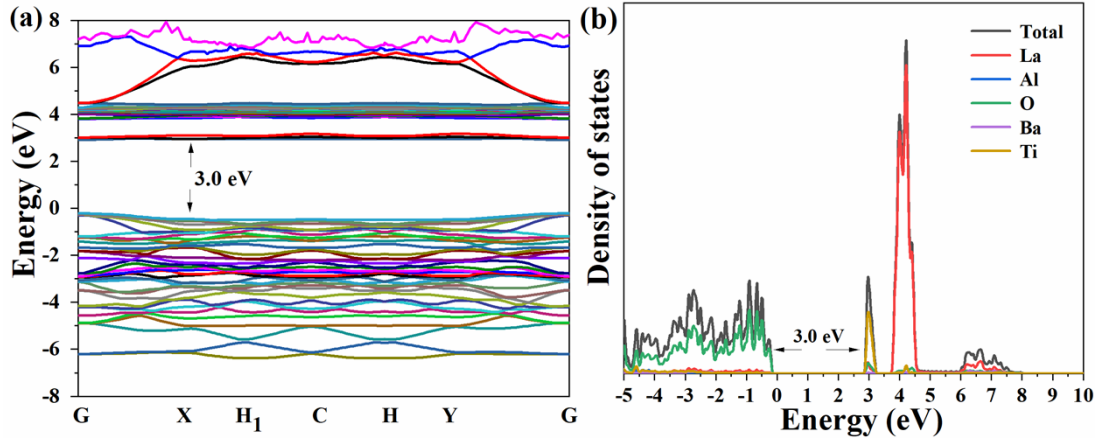

**Fig. S2** Calculated band structure (a) and partial density of states (b) for the  $\text{La}_{0.8}\text{Ba}_{0.2}\text{Al}_{0.8}\text{Ti}_{0.2}\text{O}_3$  host.

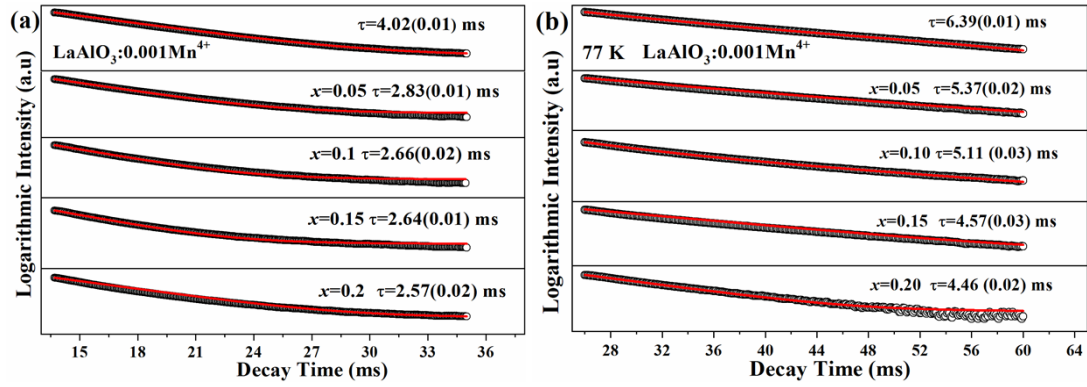

**Fig. S3** Decay curves of LBAT:0.001Mn<sup>4+</sup> ( $x=0-0.2$ ) under excitation at 340 nm and monitoring at 726 nm at room temperature (a) and 77 K (b).

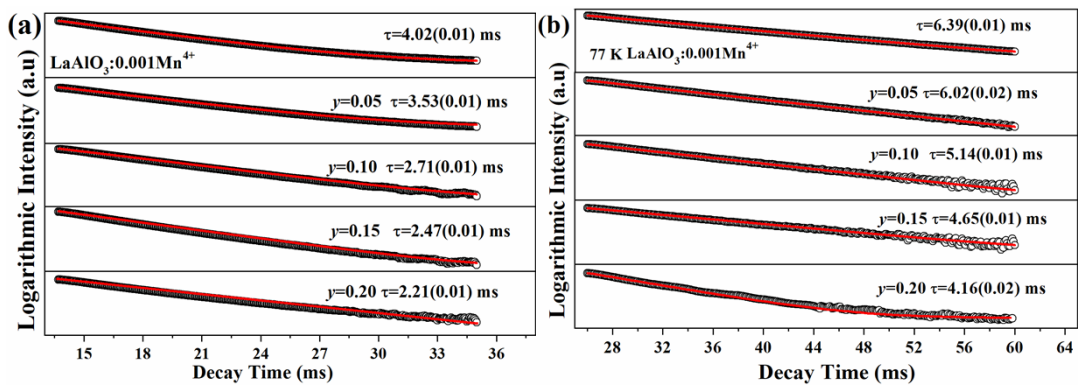

**Fig. S4** Decay curves of LYAG:0.001Mn<sup>4+</sup> ( $y=0-0.2$ ) under excitation at 340 nm and monitoring at 726 nm at room temperature (a) and 77 K (b).

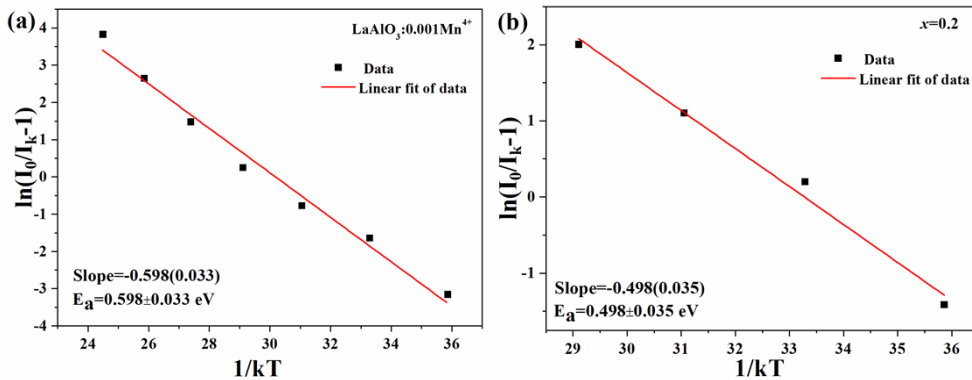

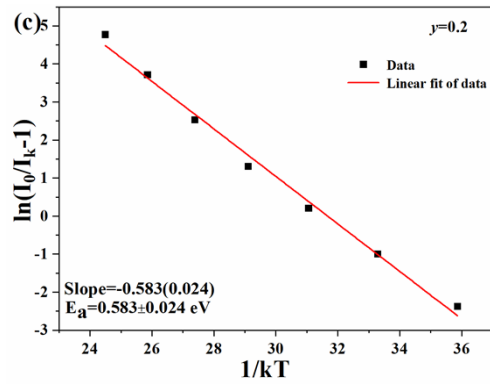

**Fig. S5** The  $\ln(I_0/I_K-1)$  vs  $1/kT$  plot for determination of the activation energy of thermal quenching for (a)  $\text{LaAlO}_3:0.001\text{Mn}^{4+}$ , (b)  $x=0.2$  and (c)  $y=0.2$ .
